# Supplementary material
Source: ML conference proceedings conference paper supplement (https://openaccess.thecvf.com/content/ICCV2023/html/Fioresi_TeD-SPAD_Temporal_Distinctiveness_ICCV_2023_paper.html)
Supplement: Supplementary file 2 [file Fioresi_TeD-SPAD_Temporal_Distinctiveness_ICCV_2023_supplemental.zip]

Archive with 4 entries (4 files):
- 02874-supp/02874-supp.pdf
- 02874-supp/vid1_assault.mp4
- 02874-supp/vid2_fighting.mp4
- 02874-supp/vid3_shoplifting.mp4
